# Supplementary figures and images for: The impact of heatwaves on mortality in Australia: a multicity study
Source: HighWire-hosted journal article supplement (doi:10.1136/bmjopen-2013-003579), 2014-02-01

Supplemental Figure 1 The distribution of daily mean temperature (oC) and mortality (1988 – 2009)

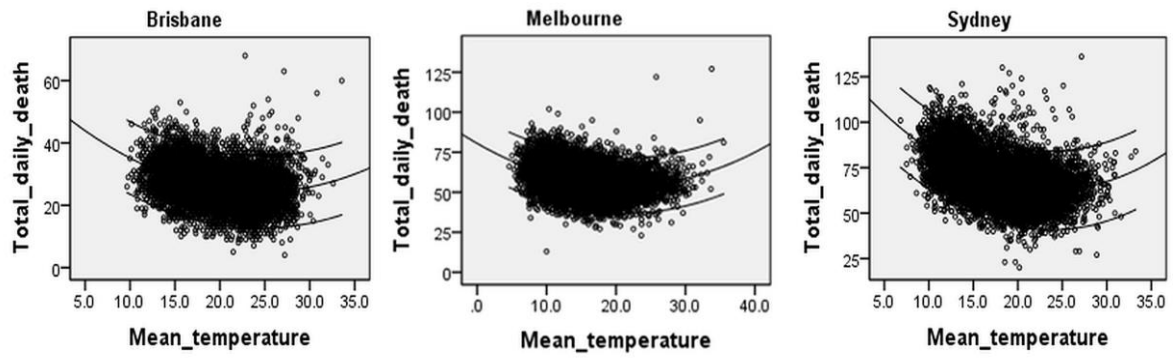

Supplement: bmjopen-2013-003579supp_figure.pdf [file bmjopen-2013-003579supp_figure.pdf]
